# Supplementary material for: Issues with RNF43 antibodies to reliably detect intracellular location
Source: PubMed Central journal article supplement (PMC10079101; doi:10.1371/journal.pone.0283894), 2023-04-06

# Supplemental Figure 1, page 1

original immunoblot images

HPA008079 Rabbit polyclonal antibody (fluorescence)

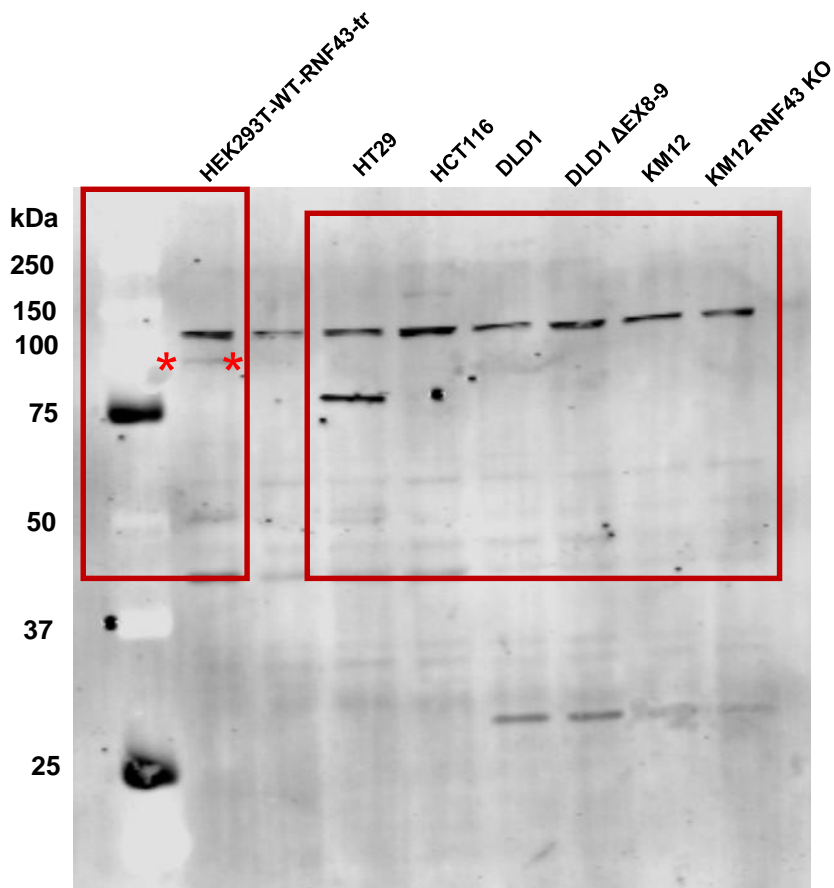

Actin (fluorescence)

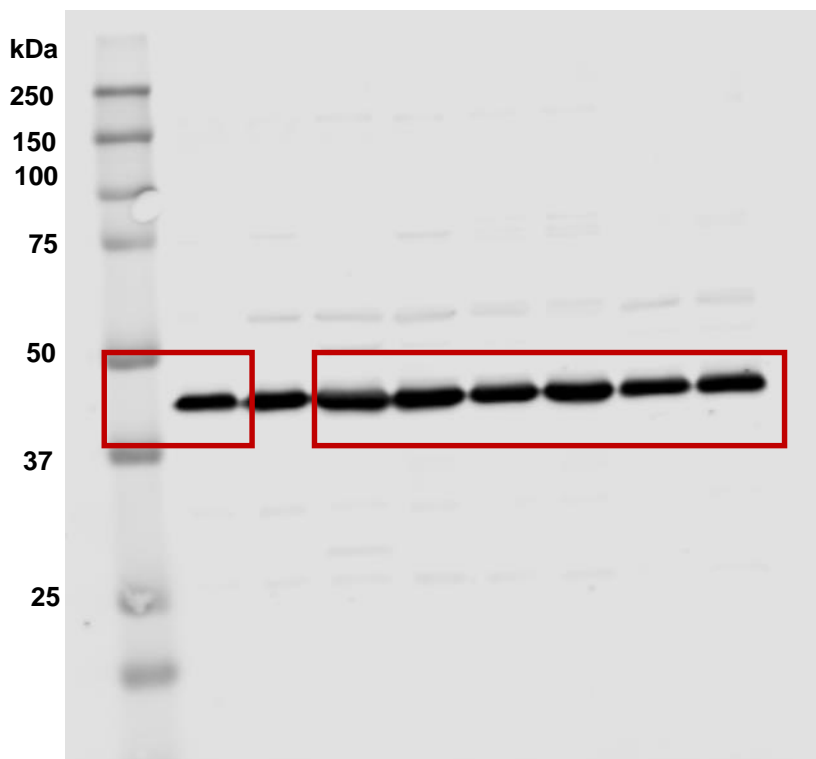

# Supplemental Figure 1, page 2

original immunoblot images

8D6 Rat monoclonal antibody (fluorescence)

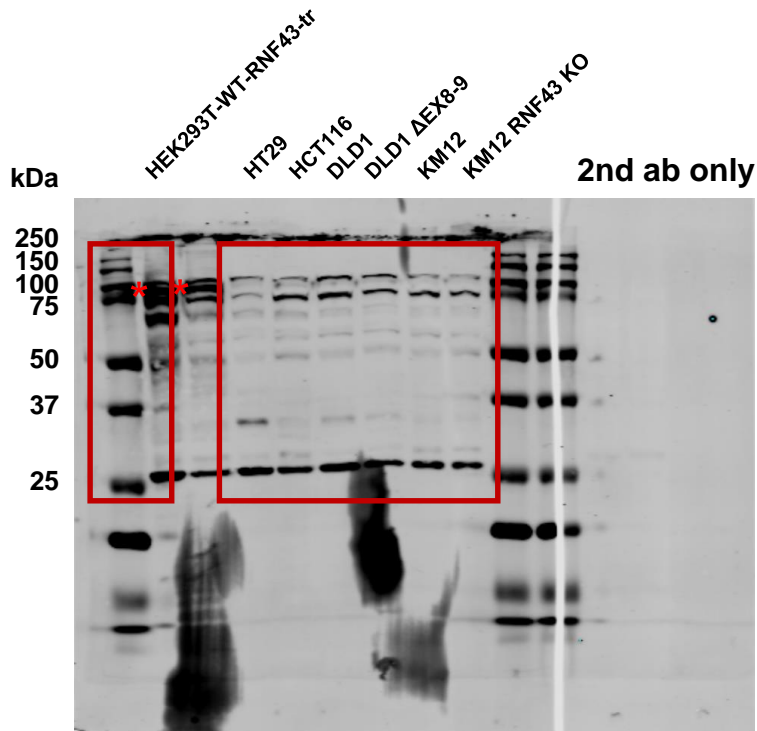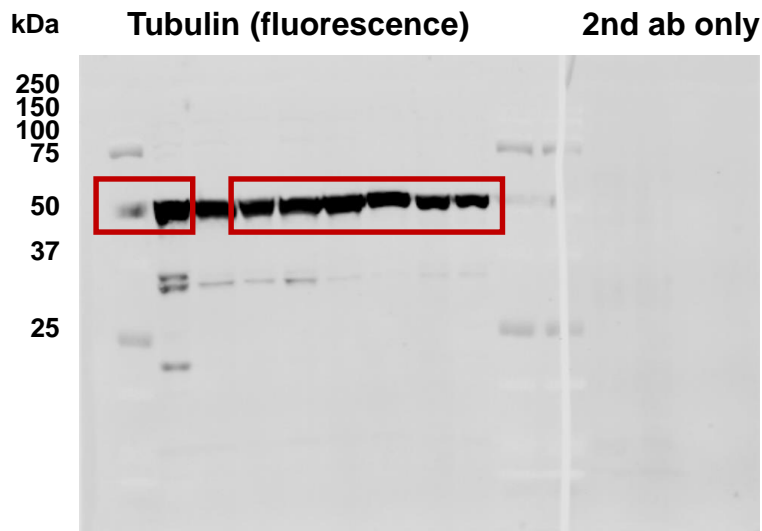

# Supplemental Figure 1, page 3

original immunoblot images

**Abcam ab84125** Rabbit polyclonal antibody (fluorescence)

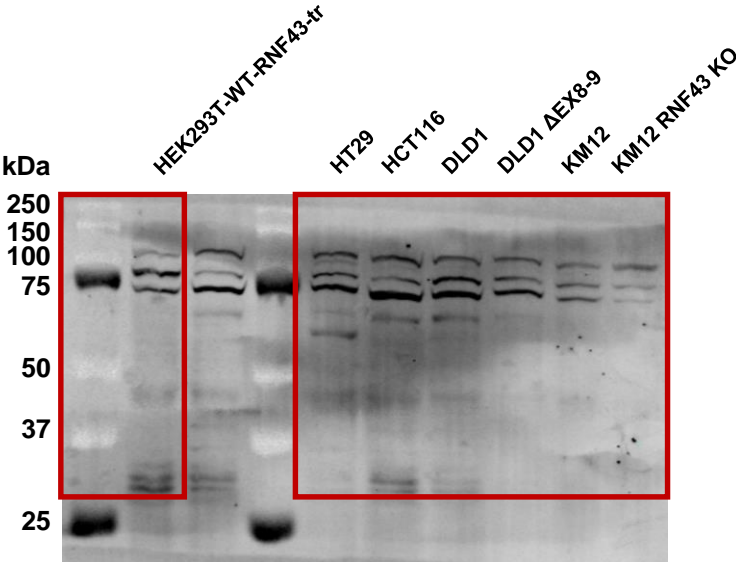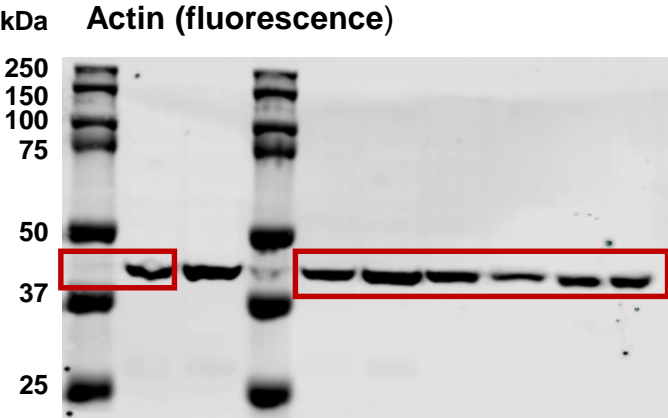

# Supplemental Figure 1, page 4

original immunoblot images

Abcam ab217787 Rabbit polyclonal antibody (fluorescence)

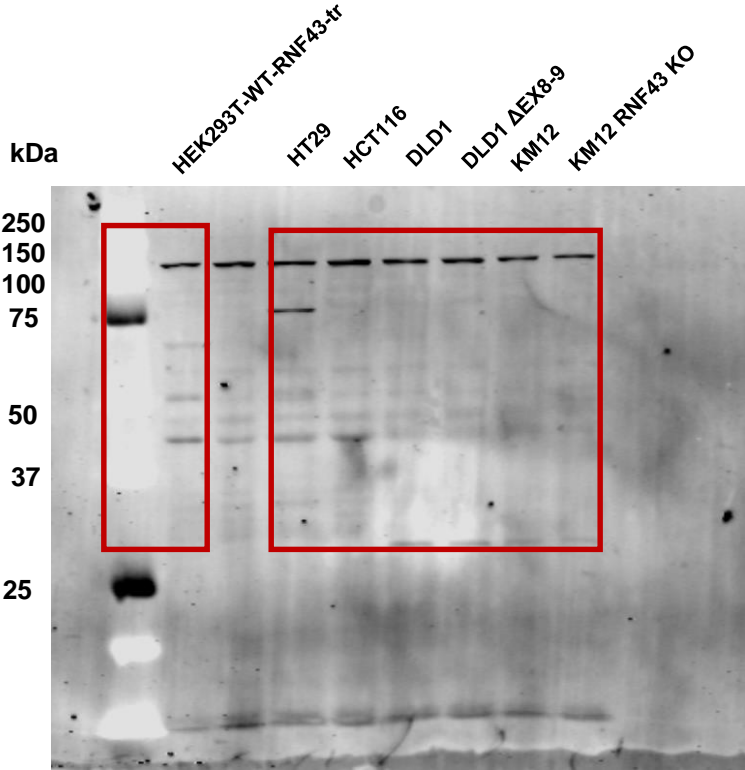

## Actin (fluorescence)

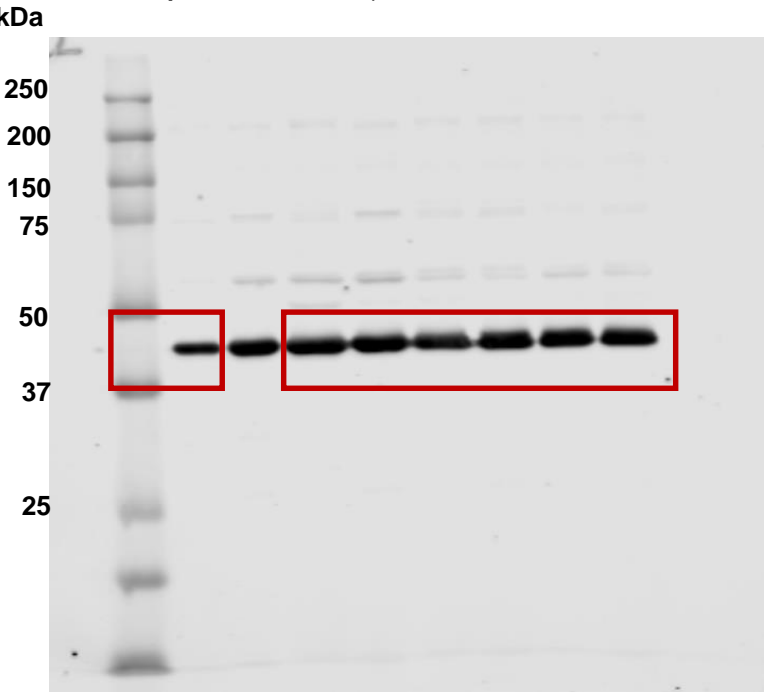

# Supplemental Figure 1, page 5

Original immunoblot image

8D6 Rat monoclonal antibody (ECL; not shown in Figure 1)

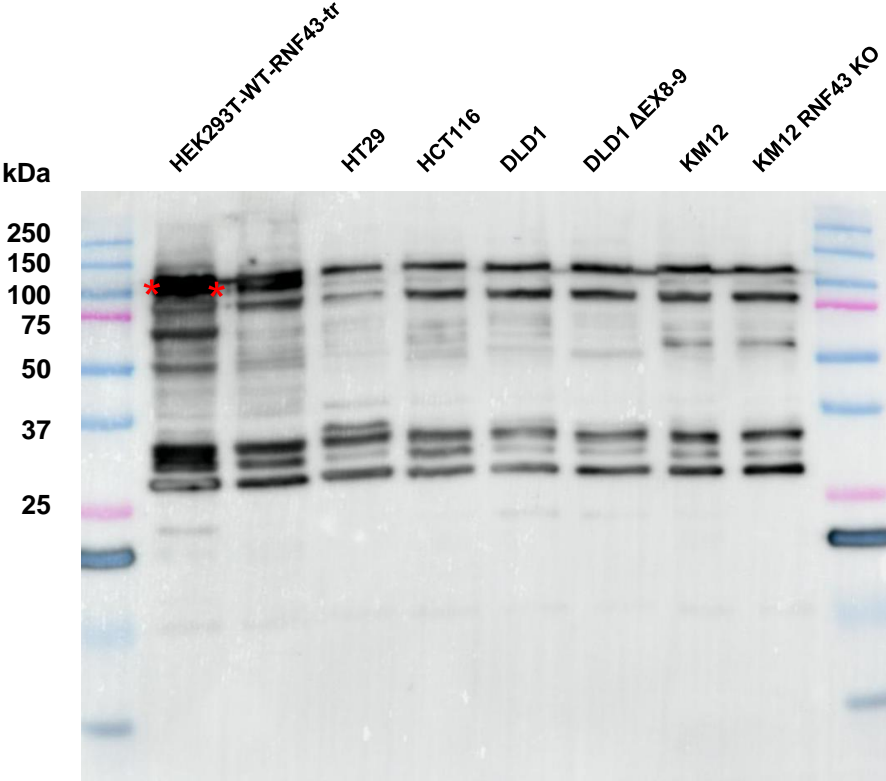

# Supplemental Figure 1, page 6

original immunoblot images  
Monoclonal ANTI-FLAG M2 antibody

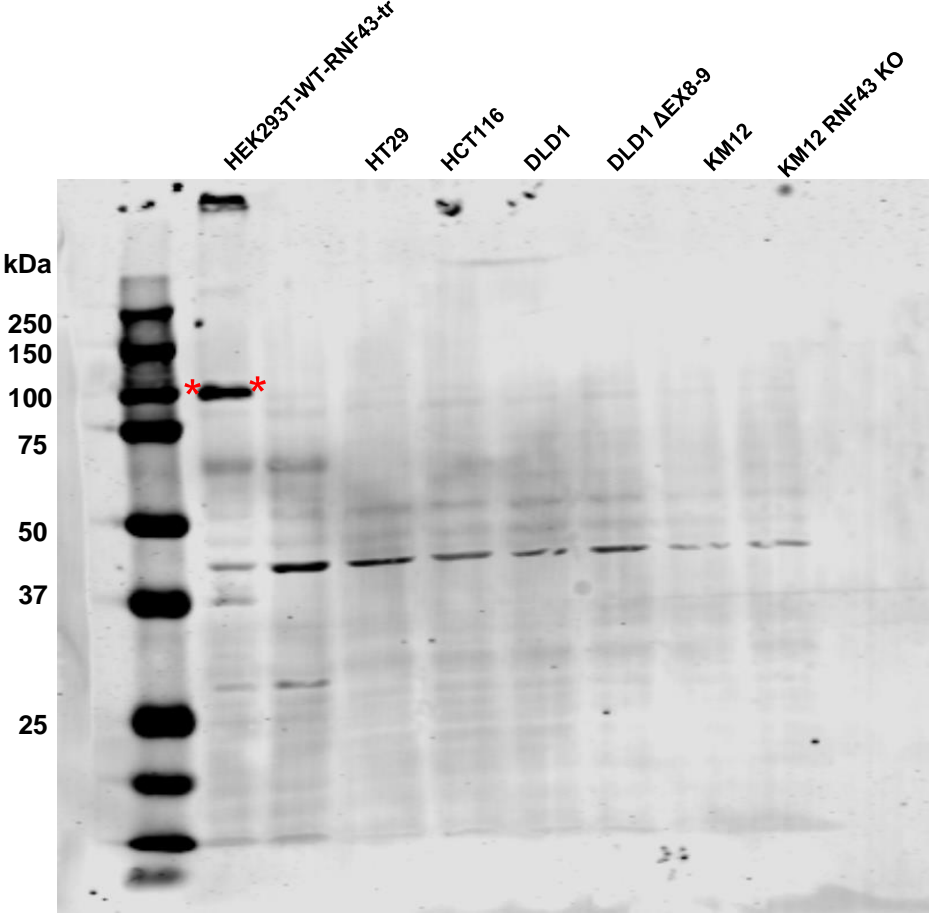

## Supplemental Figure 1, page 7

Original IB images for Figure 4  
Monoclonal ANTI-FLAG M2 antibody

RNF43-3xFLAG ANTI-FLAG (ECL)

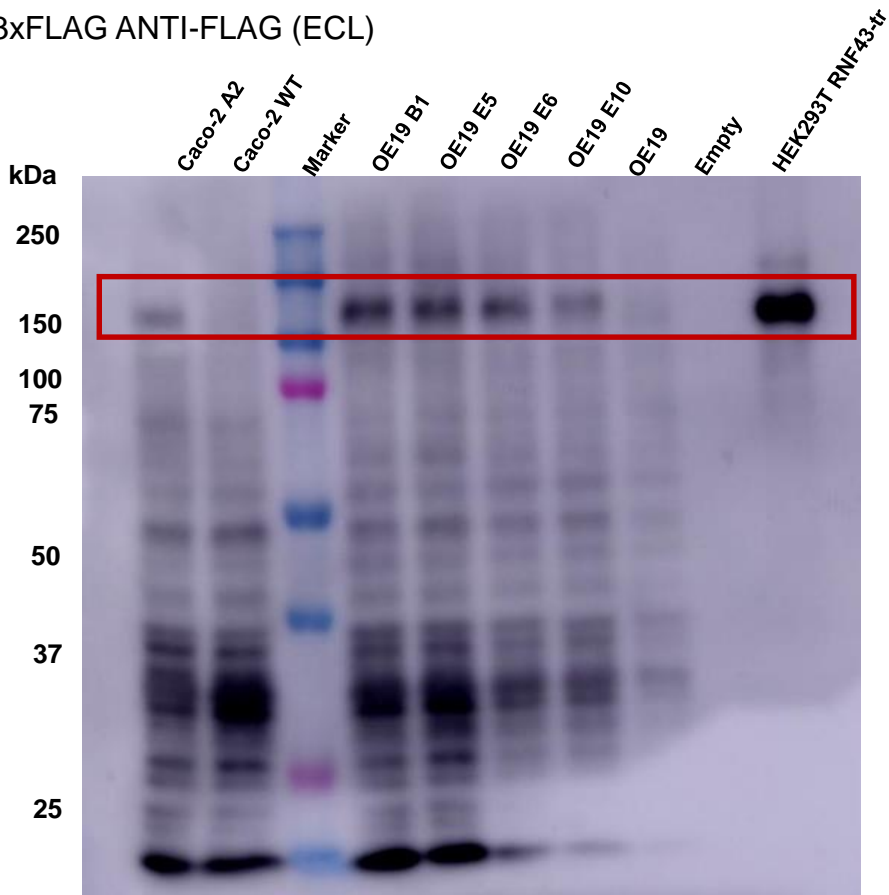

Actin (fluorescence)

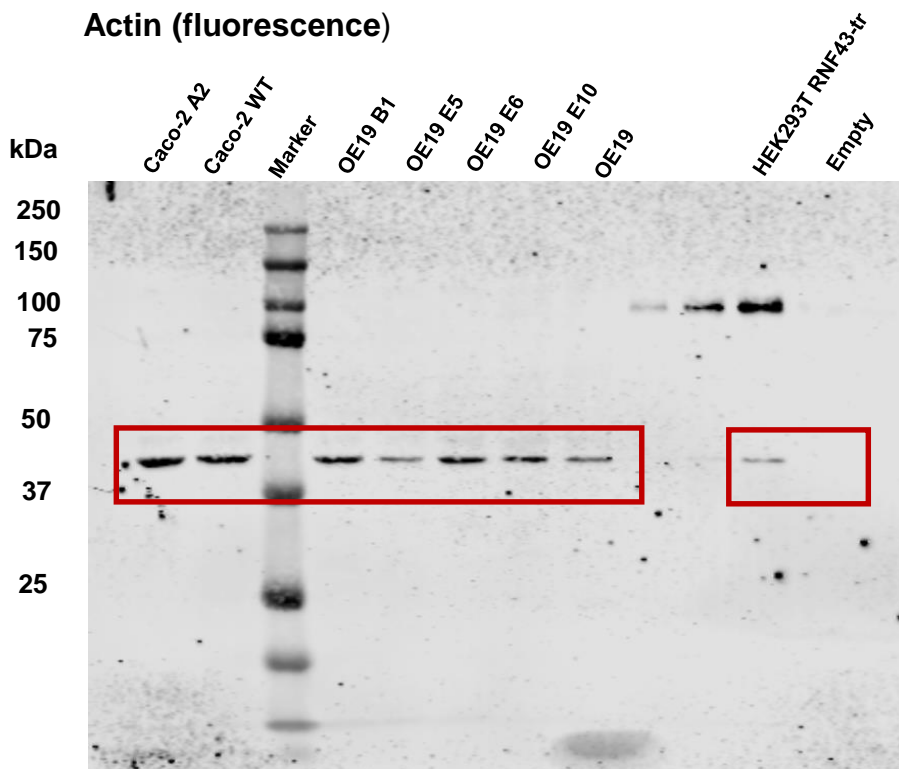

Supplement: pone.0283894.s001.pdf [file pone.0283894.s001.pdf]
