# Supplementary material for: Issues with RNF43 antibodies to reliably detect intracellular location
Source: PubMed Central journal article supplement (PMC10079101; doi:10.1371/journal.pone.0283894), 2023-04-06

## Supplemental Figure 2, page 1

**A**

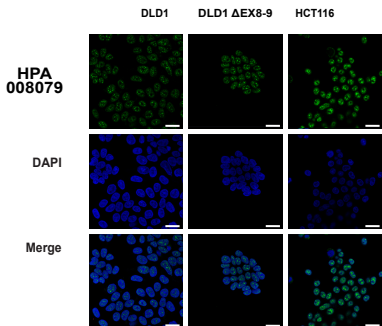

**B**

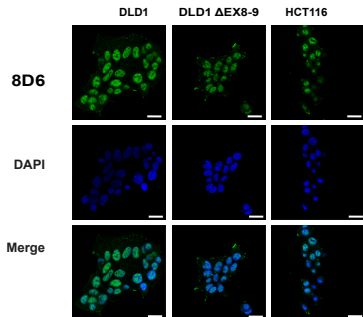

## Supplemental Figure 2, page 2

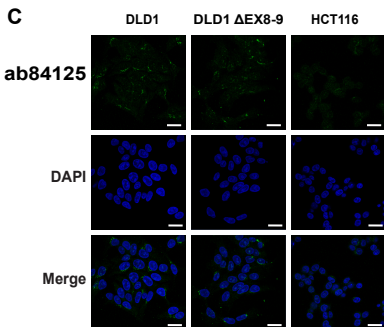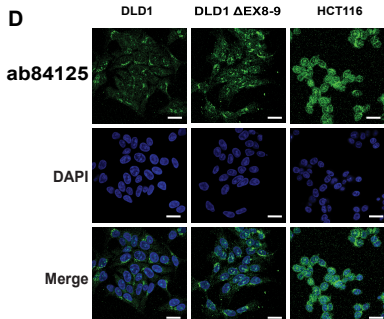

## Supplemental Figure 2, page 3

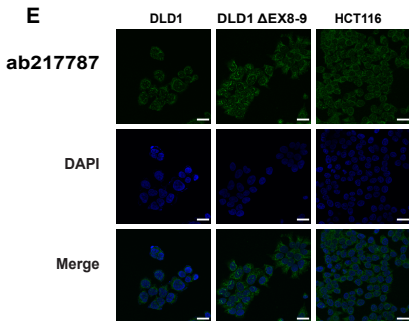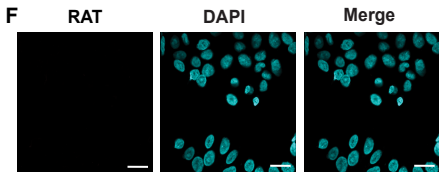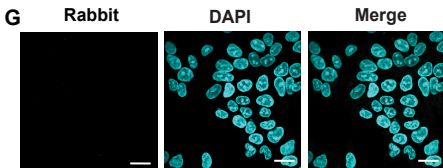

Supplement: pone.0283894.s002.pdf [file pone.0283894.s002.pdf]
